# Supplementary material
Source: PubMed Central journal article supplement (PMC2443823)
Supplement: NIHMS48694-supplement.pdf [file NIHMS48694-supplement.pdf]

## Supplementary information for Huai *et al.* “Crystal structure of a human vitronectin, urokinase, and urokinase receptor complex”

Fig. S1. Stereo view of the electron density map of suPAR-ATF-SMB complex ( $\sigma_A$ -weighted 2Fo-Fc map contoured at  $1\sigma$  level) in the uPAR-SMB interface. This figure is in the same orientation and has the same labels as the Fig. 2A. The figure was made with pymol<sup>1</sup>.

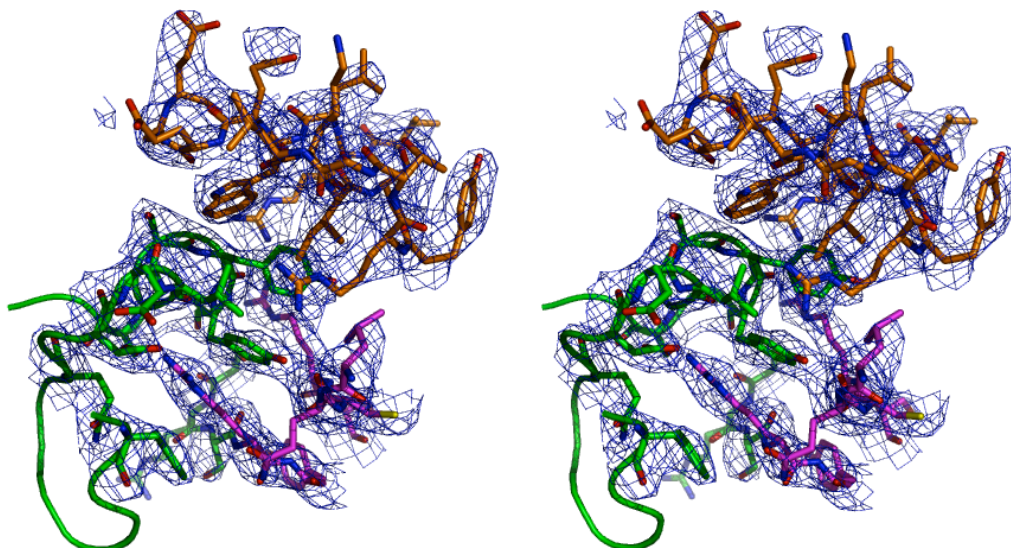

**Table 1** Data collection and model refinement statistics of suPAR-ATF-SMB-ATN615 and suPAR-ATF-SMB complexes.

|                                        | suPAR-ATF-SMB-ATN615          | suPAR-ATF-SMB                 |
|----------------------------------------|-------------------------------|-------------------------------|
| <b>Data collection</b>                 |                               |                               |
| Space group                            | P21                           | P21212                        |
| Cell dimensions                        |                               |                               |
| <i>a, b, c</i> (Å)                     | 52.10, 87.20, 124.27          | 97.35, 105.19, 55.36          |
| $\alpha, \beta, \gamma$ (°)            | 90.00, 94.31, 90.00           | 90.00, 90.00, 90.00           |
| Resolution (Å)                         | 2.50(2.59-2.50) *             | 2.80(2.90-2.80) *             |
| $R_{\text{sym}}$ or $R_{\text{merge}}$ | 0.077 (0.356) *               | 0.081 (0.803)                 |
| $I / \sigma I$                         | 24.1 (2.8) *                  | 33.1 (2.6) *                  |
| Completeness (%)                       | 99.2% (96.0%)*                | 99.5% (100.0%)*               |
| Redundancy                             | 5.3 (4.1) *                   | 5.7 (5.9) *                   |
| <b>Refinement</b>                      |                               |                               |
| Resolution (Å)                         | 124.0-2.50 (2.56-2.50) *      | 31.01-2.90 (2.97-2.90) *      |
| No. reflections                        | 37032                         | 12448                         |
| $R_{\text{work}} / R_{\text{free}}$    | 0.228 (0.267) / 0.272 (0.344) | 0.237 (0.354) / 0.316 (0.416) |
| No. atoms                              |                               |                               |
| Protein                                | 6601                          | 3463                          |
| Ligand/ion                             | 0                             | 0                             |
| Water                                  | 57                            | 0                             |
| <i>B</i> -factors                      |                               |                               |
| Protein                                | 72.2                          | 75.9                          |
| Ligand/ion                             | 72.5                          | 75.9                          |
| Water                                  | 0                             | 0                             |

|                   |       |       |
|-------------------|-------|-------|
| Water             | 39.8  | 0     |
| R.m.s. deviations |       |       |
| Bond lengths (Å)  | 0.018 | 0.015 |
| Bond angles (°)   | 1.740 | 1.747 |

\*Note: data in parentheses are for the highest resolution shell indicated in “Resolution”

**Table 2A** Residues in uPAR-SMB interface and their contact area and exposed area for suPAR-ATF-SMB complex

| uPAR   | Contact Area, Å <sup>2</sup> | Exposed Area, Å <sup>2</sup> | Percent Contact | SMB   | Contact Area, Å <sup>2</sup> | Exposed Area, Å <sup>2</sup> | Percent Contact |
|--------|------------------------------|------------------------------|-----------------|-------|------------------------------|------------------------------|-----------------|
| Arg91  | 93.7                         | 183.0                        | 51              | Tyr27 | 94.1                         | 148.0                        | 64              |
| Trp32  | 54.8                         | 171.0                        | 32              | Tyr28 | 84.8                         | 132.8                        | 64              |
| Arg116 | 44.7                         | 182.0                        | 25              | Leu24 | 33.4                         | 96.7                         | 35              |
| Arg30  | 30.8                         | 174.6                        | 18              | Phe13 | 29.8                         | 134.3                        | 22              |
| Ile63  | 26.7                         | 107.9                        | 25              | Ser26 | 21.9                         | 76.4                         | 29              |
| Gln114 | 23.3                         | 124.1                        | 19              | Asp22 | 15.3                         | 56.9                         | 27              |
| Arg58  | 10.1                         | 204.1                        | 5               | Gln29 | 14.9                         | 128.4                        | 12              |
| Ser88  | 9.6                          | 93.8                         | 10              | Glu23 | 5.9                          | 131.7                        | 5               |
| Ser56  | 8.5                          | 112.5                        | 8               | Ser30 | 5.0                          | 44.9                         | 11              |
| Ser65  | 7.1                          | 86.1                         | 8               | Gln20 | 3.7                          | 41.2                         | 9               |

**Table 2B** Hydrogen bonds in suPAR-SMB interface

| uPAR       | SMB       | Distance, Å |
|------------|-----------|-------------|
| Arg91 NH2  | Asp22 OD1 | 2.99        |
| Arg91 NH1  | Asp22 OD2 | 2.94        |
| Arg91 NH2  | Ser30 OG  | 3.19        |
| Arg30 NH2  | Ser26 O   | 3.09        |
| Arg30 NH1  | Tyr27 O   | 2.96        |
| Arg116 NH1 | Tyr27 O   | 3.22        |
| Arg116 NH2 | Gln29 OE1 | 3.11        |
| Gln14 N    | Tyr28 OH  | 2.75        |
| Ser56 OG   | Tyr27 OH  | 2.82        |
| Glu34 OE1  | Lys40 NZ  | 2.74        |

## Supplementary Methods

Both recombinant soluble uPAR (suPAR, residue 1-277) and ATF (amino acid residue 1-143 of uPA) were produced in *Drosophila* S2 cells as secreted proteins and were purified as described<sup>2,3</sup>. The suPAR-ATF complex was formed by incubating ATF with suPAR at room temperature in 50 mM HEPES and 100 mM NaCl pH 7.4 and was purified on a Superdex75 gel filtration column. SMB domain (amino acid residue 1-50 of vitronectin) was expressed in *E. Coli* and purified as described<sup>4</sup>.

To crystallize suPAR-ATF-SMB complex, the suPAR-ATF complex (about

10 mg/ml) was mixed with SMB domain of vitronectin at 1:3 molar ratio, and the crystals were generated by the microdialysis method using a precipitant solution of 12% PEG3350, 50mM HEPES at pH 7.5. For X-ray diffraction data collection, the crystals were frozen using a cryo-protectant solution of 25% PEG3350, 25% glycerol, 50 mM HEPES pH 7.5.

The quaternary protein complex, suPAR-ATF-SMB-ATN-615, where ATN-615 is a Fab fragment of an anti-uPAR antibody, were also formed by mixing the purified suPAR-ATF-ATN615 with SMB at molar ratio of 1:3 to 1:5. The crystals of the quaternary protein complex were also generated by microdialysis with a precipitant solution of 8% PEG4K, 2.5% ethanol, 0.05% sodium azide, 50 mM cacodylate pH 6.5. These crystals typically appeared in 3 to 7 days, and grew to a maximal size of 0.05 x 0.2 x 0.3 mm<sup>3</sup>. The crystals were frozen using the cryoprotectant as 25% glycerol, 20% PEG4K, 50 mM cacodylate pH 6.5 for X-ray data collection. The X-ray diffraction data (Table 1) for all these crystals was collected at 100K using synchrotron radiation at the Advanced Photon Source (APS), Argonne National Laboratory. The suPAR-ATF or the suPAR-ATF-ATN-615 model (from the PDB entry 1fd6<sup>5</sup>) were each positioned into the crystals of the ternary or the quaternary complexes by molecular replacement methods (molrep<sup>6</sup>). After refinement using the CNS program<sup>7</sup>, the Fo-Fc difference electron density showed the electron density for SMB domain of vitronectin, which was added to the model according to the X-ray structure of SMB<sup>4</sup>. The resulting models were refined using CNS<sup>7</sup> and REFMAC<sup>8</sup>, and manual model fitting was carried out using the program O<sup>9</sup>. The final structures were analyzed by PROCHECK<sup>10</sup>, PYMOL<sup>1</sup> and MOLSOFT ICM<sup>11</sup>. Ramachandran plots of the structures showed that 84.5%, 13.2%, 1.5%, 0.8% of residues are in the core, allowed, generally allowed, and disallowed regions for suPAR-ATF-SMB-ATN615 structure,, respectively. For suPAR-ATF-SMB structure, the corresponding distributions are 70.4%, 23.3%, 3.4%, and 2.9%, respectively.

The ternary structure suPAR-ATF-SMB contains more ordered residues (uPAR 1-82, 87-275; SMB: 2-41; ATF: 8-132) compared with the quaternary structure (uPAR 1-80, 87-130, 139-275; SMB: 2-41; ATF: 9-132; H2O: 1-57), and was used for further analysis.

#### References:

1. DeLano, W.L. The PyMol Molecular Graphics System. *DeLano Scientific, San Carlos, CA* (2004).
2. Huang, M.D. et al. Crystallization of soluble urokinase receptor (suPAR) in complex with urokinase amino-terminal fragment (1-143). *Acta Crystallographica Section D-Biological Crystallography* **61**, 697-700 (2005).
3. Bdeir, K. et al. A region in domain II of the urokinase receptor required for urokinase binding. *Journal of Biological Chemistry* **275**, Tyr28532-Tyr28538 (2000).
4. Zhou, A., Huntington, J.A., Pannu, N.S., Carrell, R.W. & Read, R.J. How vitronectin binds

- PAI-1 to modulate fibrinolysis and cell migration. *Nat Struct Biol* **10**, 541-4 (2003).
5. Huai, Q. et al. Structure of human urokinase plasminogen activator in complex with its receptor. *Science* **311**, 656-659 (2006).
  6. Vagin, A. & Teplyakov, A. MOLREP: an automated program for molecular replacement. *J. Appl. Cryst.* **30**, 1022-1025 (1997).
  7. Brunger, A.T. et al. Crystallography & NMR system: A new software suite for macromolecular structure determination. *Acta Crystallogr D Biol Crystallogr* **54**, 905-21 (1998).
  8. Murshudov, G.N., Vagin, A.A. & Dodson, E.J. Refinement of macromolecular structures by the maximum-likelihood method. *Acta Crystallogr D Biol Crystallogr* **53**, 240-55 (1997).
  9. Jones, T.A., Zou, J.-Y., Cowan, S.W. & Kjeldgaard, M. Improved methods for building protein models in electron density maps and the locations of errors in three models. *Acta Crystallogr.* **A47**, 110-119 (1991).
  10. Laskowski, R.A., MacArthur, M.W., Mass, D.S. & Thornton, J.M. PROCHECK: a program to check the stereochemical quality of protein structures. *J. Appl. Crystallogr.* **26**, 283-291 (1993).
  11. Abagyan, R.A., Totrov, M.M. & Kuznetsov, D.N. ICM - a new method for protein modeling and design. Applications to docking and structure prediction from the distorted native conformation. *J. Comp. Chem.* **15**, 488-506 (1994).
